# Supplementary material for: Two Novel Species and Two New Records within the Genus Pluteus (Agaricomycetes, Agaricales) from Thailand
Source: MDPI journal article supplement (doi:10.3390/d14030156), 2022-02-23
Supplement: s1 [file s1]

**Supplementary Table S1.**

Details of sequences used in phylogenetic analysis.

| Taxon                             | Collection/ isolate/<br>voucher/ strain | GenBank accession number |          |
|-----------------------------------|-----------------------------------------|--------------------------|----------|
|                                   |                                         | ITS                      | LSU      |
| <i>Pluteus chandrasrikuliae</i>   | BKF10214 <sup>T</sup>                   | MN492649                 | OM250115 |
| <i>Pluteus chandrasrikuliae</i>   | NW1565                                  | OM257409                 | OM250229 |
| <i>Pluteus aurantiorugosus</i>    | AJ219                                   | HM562041                 | —        |
| <i>Pluteus podospileus</i>        | TNSF12398                               | HM562122                 | —        |
| <i>Pluteus podospileus</i>        | AJ782                                   | KM983687                 | —        |
| <i>Pluteus inconspiuus</i>        | PDD 72485 <sup>T</sup>                  | MN738614                 | —        |
| <i>Pluteus podospilloides</i>     | LE 313230 <sup>T</sup>                  | MT611236                 | —        |
| <i>Pluteus necopinatus</i>        | FK1701                                  | KM983693                 | —        |
| <i>Pluteus brunneocrinitus</i>    | MC4535                                  | KM983692                 | —        |
| <i>Pluteus crinitus</i>           | FK2064 <sup>T</sup>                     | KM983691                 | —        |
| <i>Pluteus seticeps</i>           | SF23                                    | HM562191                 | —        |
| <i>Pluteus seticeps</i>           | Shaffer798                              | HM562199                 | —        |
| <i>Pluteus pygmaeus</i>           | LE 313236 <sup>T</sup>                  | MT611235                 | —        |
| <i>Pluteus flavidus</i>           | LE 313526 <sup>T</sup>                  | MT611242                 | —        |
| <i>Pluteus flavidus</i>           | LE 313527                               | MT611243                 | —        |
| <i>Pluteus diptychocystis</i>     | NMJ184                                  | KM983674                 | —        |
| <i>Pluteus hirtellus</i>          | SFSU:DED 8259 <sup>T</sup>              | MG968804                 | —        |
| <i>Pluteus albotomentosus</i>     | LE 289394                               | KM658284                 | —        |
| <i>Pluteus tomentosulus</i>       | MO93719                                 | KM983672                 | —        |
| <i>Pluteus tomentosulus</i>       | MO163564                                | KM983673                 | —        |
| <i>Pluteus squamulososulcatus</i> | LE 313237 <sup>T</sup>                  | MT611234                 | —        |
| <i>Pluteus ephebeus</i>           | 10151                                   | JF908621                 | —        |
| <i>Pluteus ephebeus</i>           | 9823                                    | JF908620                 | —        |
| <i>Pluteus halonatus</i>          | FK2084                                  | KM983680                 | —        |
| <i>Pluteus halonatus</i>          | NK17                                    | KM983679                 | —        |
| <i>Pluteus castaneorugosus</i>    | LE 313071 <sup>T</sup>                  | MT611237                 | —        |
| <i>Pluteus stenotrichus</i>       | AJ352                                   | JN603201                 | —        |
| <i>Pluteus paucicystidiatus</i>   | SP394383                                | HM562173                 | —        |
| <i>Pluteus romellii</i>           | LE 303660                               | KX216326                 | —        |
| <i>Pluteus romellii</i>           | AJ232                                   | HM562062                 | HM562238 |
| <i>Pluteus brunneosquamulosus</i> | K12794                                  | JN603204                 | —        |
| <i>Pluteus eliae</i>              | FLAS-F-61639                            | MH212018                 | —        |
| <i>Pluteus eliae</i>              | Isaacs2460                              | HM562076                 | —        |
| <i>Pluteus atypicus</i>           | LE 313057 <sup>T</sup>                  | MT611239                 | —        |
| <i>Pluteus extremiorientalis</i>  | LE 262872 <sup>T</sup>                  | KM658280                 | —        |
| <i>Pluteus extremiorientalis</i>  | LE 303463                               | KM658282                 | —        |
| <i>Pluteus fluminensis</i>        | SP393711                                | FJ816664                 | FJ816650 |
| <i>Pluteus beniensis</i>          | RSPF 0299                               | JQ065029                 | —        |
| <i>Pluteus jamaicensis</i>        | SP393706                                | FJ816657                 | —        |
| <i>Pluteus sapiicola</i>          | SP394382                                | HM562148                 | —        |

|                                 |                            |          |          |
|---------------------------------|----------------------------|----------|----------|
| <i>Pluteus rimosoaffinis</i>    | SP416740                   | KM983706 | –        |
| <i>Pluteus floccipes</i>        | X113                       | LN794642 | –        |
| <i>Pluteus cinereofuscus</i>    | AJ324                      | HM562124 | –        |
| <i>Pluteus podospileus</i>      | KA12-1285                  | KR673523 | –        |
| <i>Pluteus ludwigii</i>         | MCVE30136 <sup>T</sup>     | MK834525 | MK834527 |
| <i>Pluteus multiformis</i>      | AC4249                     | HM562201 | –        |
| <i>Pluteus keselakii</i>        | PAM99052202                | MN250224 | –        |
| <i>Pluteus keselakii</i>        | X126 <sup>T</sup>          | MN250223 | –        |
| <i>Pluteus hispidilacteus</i>   | PDD 108758                 | MN738667 | MN738602 |
| <i>Pluteus liliputianus</i>     | LE 312868                  | MK982288 | MK982304 |
| <i>Pluteus varius</i>           | LE 313238 <sup>T</sup>     | MT611231 | –        |
| <i>Pluteus varius</i>           | LE 313528                  | MT611232 | –        |
| <i>Pluteus exiguus</i>          | LE 226543                  | FJ774083 | –        |
| <i>Pluteus exiguus</i>          | LE 253673                  | MK982301 | –        |
| <i>Pluteus hispidulopsis</i>    | NMJ179                     | KM983684 | –        |
| <i>Pluteus bizioi</i>           | MCVE:29363 <sup>T</sup>    | MG946813 | –        |
| <i>Pluteus bizioi</i>           | MCVE:29417                 | MG947206 | –        |
| <i>Pluteus karstedtia</i>       | FK637                      | KM983683 | –        |
| <i>Pluteus karstedtia</i>       | FK1700 <sup>T</sup>        | KM983682 | –        |
| <i>Pluteus spurius</i>          | LE 312866 <sup>T</sup>     | MK982290 | MK982303 |
| <i>Pluteus phlebophorus</i>     | LE 312918                  | KX216338 | –        |
| <i>Pluteus phlebophorus</i>     | AJ228                      | HM562138 | –        |
| <i>Pluteus pallidus</i>         | Smith62487 <sup>T</sup>    | HM562193 | –        |
| <i>Pluteus brunneovelutinus</i> | LE 313240 <sup>T</sup>     | MT611233 | –        |
| <i>Pluteus diettrichii</i>      | GM2581                     | KM983714 | –        |
| <i>Pluteus diettrichii</i>      | JLS1624                    | HM562143 | –        |
| <i>Pluteus fenzlii</i>          | TNSF12376                  | HM562091 | –        |
| <i>Pluteus mammillatus</i>      | EIU ASM 7916               | NR119874 | –        |
| <i>Pluteus mammillatus</i>      | Minnis309202               | HM562086 | –        |
| <i>Pluteus poliocnemis</i>      | GM2190                     | KM983715 | –        |
| <i>Pluteus griseodiscus</i>     | GDGM42280 <sup>T</sup>     | KR350490 | –        |
| <i>Pluteus losulus</i>          | SFSU:DED 8313 <sup>T</sup> | MG968803 | –        |

Superscript T in the collection/ isolate/ voucher/ strain column indicates a type species.

Details of *Pluteus* sect. *Hispidoderma* sequences used for phylogenetic analysis.

| Taxon                             | Collection/ isolate/<br>voucher/ strain | GenBank accession number |          |
|-----------------------------------|-----------------------------------------|--------------------------|----------|
|                                   |                                         | ITS                      | LSU      |
| <i>Pluteus saisamorniae</i>       | BKF10213 <sup>T</sup>                   | MN492646                 | OM250111 |
| <i>Pluteus saisamorniae</i>       | NW1567                                  | OM257410                 | OM250370 |
| <i>Pluteus semibulbisus</i>       | OKA-TR06                                | MK123344                 | –        |
| <i>Pluteus semibulbisus</i>       | LE 312914                               | KX216353                 | –        |
| <i>Pluteus semibulbisus</i>       | A5058211                                | KR022020                 | –        |
| <i>Pluteus minor</i>              | JAC14348                                | MN738650                 | –        |
| <i>Pluteus minor</i>              | JAC14793                                | MN738660                 | –        |
| <i>Pluteus longistriatus</i>      | KA17-0331                               | MN294886                 | –        |
| <i>Pluteus plautus</i>            | UBCF23774                               | KC581304                 | –        |
| <i>Pluteus plautus</i>            | UBC F23908                              | KJ146724                 | –        |
| <i>Pluteus diana</i>              | PR 629413 <sup>T</sup>                  | MH656433                 | –        |
| <i>Pluteus diana</i>              | LE 312950                               | MH656430                 | –        |
| <i>Pluteus decoloratus</i>        | PDD 110522                              | MN738677                 | MN738609 |
| <i>Pluteus decoloratus</i>        | JAC14640                                | MN738654                 | –        |
| <i>Pluteus punctatus</i>          | PRM 682743 <sup>T</sup>                 | MH656438                 | –        |
| <i>Pluteus punctatus</i>          | JHC04 298                               | MH656480                 | –        |
| <i>Pluteus granulatus</i>         | OKA-349                                 | MG544916                 | –        |
| <i>Pluteus granulatus</i>         | AJ203                                   | HM562048                 | HM562226 |
| <i>Pluteus granulatus</i>         | LE 212990                               | FJ774086                 | –        |
| <i>Pluteus pulcherrimus</i>       | MCVE30061 <sup>T</sup>                  | MK446327                 | –        |
| <i>Pluteus heteromarginatus</i>   | AJ172                                   | HM562058                 | HM562249 |
| <i>Pluteus pantherinus</i>        | TNSF12882                               | HM562089                 | –        |
| <i>Pluteus pantherinus</i>        | ASIS25041                               | KF692077                 | –        |
| <i>Pluteus granularis</i>         | SF20                                    | HM562189                 | –        |
| <i>Pluteus umbrosoides</i>        | LE 312735 <sup>T</sup>                  | KX216321                 | –        |
| <i>Pluteus umbrosus</i>           | SAT-16-238-13                           | MW597168                 | –        |
| <i>Pluteus umbrosus</i>           | LE 312840                               | KX216345                 | –        |
| <i>Pluteus velutinus</i>          | LE 289495                               | KX216341                 | –        |
| <i>Pluteus velutinus</i>          | TNSF12372                               | HM562127                 | –        |
| <i>Pluteus velutinus</i>          | K12851                                  | JN603205                 | –        |
| <i>Pluteus readiarum</i>          | PDD 103772                              | MN738644                 | MN738592 |
| <i>Pluteus readiarum</i>          | JAC11228                                | MN738638                 | –        |
| <i>Pluteus pallidosquamulosus</i> | LE 313056 <sup>T</sup>                  | MT611240                 | –        |
| <i>Pluteus fibrillosus</i>        | FK1903                                  | KR022018                 | –        |
| <i>Pluteus chrysaegis</i>         | FLAS-F-60411                            | MF153092                 | –        |
| <i>Pluteus chrysaegis</i>         | K13587                                  | JN603206                 | –        |
| <i>Pluteus conizatus</i>          | Thoen 5250                              | HM562142                 | –        |
| <i>Pluteus variabilicolor</i>     | OKA-106                                 | MG544909                 | –        |
| <i>Pluteus variabilicolor</i>     | OKA-116                                 | MG544908                 | –        |
| <i>Pluteus castroae</i>           | TNSF17602 <sup>T</sup>                  | HM562092                 | –        |

|                             |                            |          |   |
|-----------------------------|----------------------------|----------|---|
| <i>Pluteus roseipes</i>     | UC1998535                  | KF306003 | – |
| <i>Pluteus roseipes</i>     | OKA-440                    | MG544912 | – |
| <i>Pluteus leoninus</i>     | FG25092016021              | MK446319 | – |
| <i>Pluteus leoninus</i>     | AJ212                      | HM562045 | – |
| <i>Pluteus griseodiscus</i> | GDGM42280 <sup>T</sup>     | KR350490 | – |
| <i>Pluteus losulus</i>      | SFSU:DED 8313 <sup>T</sup> | MG968803 | – |

Superscript T in the collection/ isolate/ voucher/ strain column indicates a type species.

Details of *Pluteus* sect. *Pluteus* sequences used for phylogenetic analysis.

| Taxon                              | Collection/ isolate/ voucher/<br>strain | GenBank accession number |          |
|------------------------------------|-----------------------------------------|--------------------------|----------|
|                                    |                                         | ITS                      | LSU      |
| <i>Pluteus hibbettii</i>           | AJ794 <sup>T</sup>                      | KJ009685                 | –        |
| <i>Pluteus eos</i>                 | AJ589 <sup>T</sup>                      | KJ009683                 | –        |
| <i>Pluteus eos</i>                 | LE289379                                | KJ009675                 | –        |
| <i>Pluteus cervinus</i>            | REG 13641 <sup>T</sup>                  | HM562152                 | –        |
| <i>Pluteus cervinus</i>            | AJ590                                   | KJ009628                 | –        |
| <i>Pluteus exilis</i>              | N5105 <sup>T</sup>                      | KJ009778                 | –        |
| <i>Pluteus exilis</i>              | MSSF87                                  | KF306020                 | –        |
| <i>Pluteus rangifer</i>            | LE203210 <sup>T</sup>                   | KJ009650                 | –        |
| <i>Pluteus hongoi</i>              | Singer A4070 <sup>T</sup>               | KJ009564                 | –        |
| <i>Pluteus hongoi</i>              | Tenn48297                               | KJ009613                 | –        |
| <i>Pluteus concentricus</i>        | PDD 72493                               | MN738615                 | MN738589 |
| <i>Pluteus concentricus</i>        | PDD 72484                               | MN738613                 | MN738588 |
| <i>Pluteus elaphinus</i>           | AJ783 <sup>T</sup>                      | KJ009663                 | –        |
| <i>Pluteus elaphinus</i>           | MSP 018                                 | KJ009782                 | –        |
| <i>Pluteus olivaceofibrillosus</i> | LE313059                                | MT611230                 | –        |
| <i>Pluteus leucoborealis</i>       | LE289421 <sup>T</sup>                   | KJ009746                 | –        |
| <i>Pluteus leucoborealis</i>       | LE289424                                | KJ009743                 | –        |
| <i>Pluteus xylophilus</i>          | SP393707                                | HM562163                 | –        |
| <i>Pluteus xylophilus</i>          | NMJ147                                  | FJ816660                 | FJ816646 |
| <i>Pluteus petasatus</i>           | LE289372 <sup>T</sup>                   | KJ009705                 | –        |
| <i>Pluteus petasatus</i>           | LOU:7570                                | KJ009701                 | –        |
| <i>Pluteus pellitus</i>            | AJ72                                    | HM562036                 | HM562222 |
| <i>Pluteus pellitus</i>            | LE289374                                | KJ009698                 | –        |
| <i>Pluteus brunneidiscus</i>       | LE289397                                | KJ009693                 | –        |
| <i>Pluteus brunneidiscus</i>       | AJ586                                   | KJ009694                 | –        |
| <i>Pluteus shikae</i>              | TNSF12349 <sup>T</sup>                  | HM562093                 | –        |
| <i>Pluteus shikae</i>              | LE289383                                | KJ009696                 | –        |
| <i>Pluteus microspermus</i>        | JAC15434                                | MN738680                 | –        |
| <i>Pluteus microspermus</i>        | PDD 108760                              | MN738669                 | MN738604 |
| <i>Pluteus septocystidiatus</i>    | S.D. Russell MycoMap # 7201             | MN906259                 | –        |
| <i>Pluteus septocystidiatus</i>    | AJ154                                   | HM562057                 | –        |
| <i>Pluteus septocystidiatus</i>    | <b>BKF10212</b>                         | MN483327                 | OM250115 |
| <i>Pluteus septocystidiatus</i>    | BRNM761662 <sup>T</sup>                 | HG964401                 | –        |
| <i>Pluteus subcervinus</i>         | LE 313525                               | MT611238                 | –        |
| <i>Pluteus subcervinus</i>         | K90736                                  | KJ009752                 | –        |
| <i>Pluteus purpureofuscus</i>      | HKAS48956                               | KR350489                 | –        |
| <i>Pluteus allostipitatus</i>      | SFSU:DED 8250                           | MG968801                 | –        |
| <i>Pluteus allostipitatus</i>      | GF 5374                                 | HM562130                 | –        |
| <i>Pluteus densifibrillosus</i>    | SP393696 <sup>T</sup>                   | HM562159                 | –        |
| <i>Pluteus salicinus</i>           | LE 215427                               | FJ774087                 | –        |

|                                |                        |          |          |
|--------------------------------|------------------------|----------|----------|
| <i>Pluteus americanus</i>      | AHS57842 <sup>T</sup>  | KJ009762 | —        |
| <i>Pluteus sepiicolor</i>      | LE289365 <sup>T</sup>  | NR153242 | —        |
| <i>Pluteus oreibatus</i>       | ECV.4183 <sup>T</sup>  | NR153241 | —        |
| <i>Pluteus harrisii</i>        | SP393709               | FJ816666 | FJ816652 |
| <i>Pluteus harrisii</i>        | SP393708               | FJ816654 | FJ816644 |
| <i>Pluteus glaucotinctus</i>   | GF 5274                | HM562131 | —        |
| <i>Pluteus glaucotinctus</i>   | FLAS-F-61484           | MH211921 | —        |
| <i>Pluteus atrofibrillosus</i> | ECV4153a <sup>T</sup>  | KJ009774 | —        |
| <i>Pluteus atrofibrillosus</i> | ECV4207                | KJ009773 | —        |
| <i>Pluteus atromarginatus</i>  | LE 246081              | FJ774075 | —        |
| <i>Pluteus atromarginatus</i>  | AJ76                   | HM562040 | —        |
| <i>Pluteus losulus</i>         | SFSU:DED 8313          | MG968803 | —        |
| <i>Pluteus losulus</i>         | SDBR-CMUNK0842         | OM250105 | OM250110 |
| <i>Pluteus losulus</i>         | GDGM47122              | MH231231 | —        |
| <i>Pluteus losulus</i>         | GF 5273                | HM562129 | HM562250 |
| <i>Pluteus griseodiscus</i>    | GDGM42280 <sup>T</sup> | KR350490 | —        |
| <i>Pluteus griseodiscus</i>    | GDGM42373              | KR350492 | —        |
| <i>Pluteus aurantiorugosus</i> | AJ219                  | HM562041 | —        |
| <i>Pluteus romellii</i>        | Shaffer3715            | HM562078 | —        |

Superscript T in the collection/ isolate/ voucher/ strain column indicates a type species.
